# Supplementary material for: Refinement of sensitive azides via in situ generated azole-based metal–organic frameworks towards stable energetic materials
Source: Royal Society of Chemistry journal article supplement (doi:10.1039/d3dt01804k), 2023-01-01
Supplement: d3dt01804k1.pdf [file d3dt01804k1.pdf]

## Electronic Supplementary Information

Refinement of the sensitive azides *via in situ* generated azole-based metal–organic frameworks towards stable energetic materials

Hao-Hui Xie,<sup>[a]</sup> Jiao-Lin Weng,<sup>[a]</sup> Ji-Xing Song,<sup>[a]</sup> Wen-Jing Yang,<sup>[a]</sup> Qin Wang,<sup>[a]</sup> Meng Cui,<sup>[b]</sup> Fa-Kun Zheng,<sup>[b,c]</sup> Ren-Hui Qiu,<sup>[a]</sup> and Jian-Gang Xu<sup>[a,b,c]\*</sup>

<sup>a</sup> College of Material Engineering, Fujian Agriculture and Forestry University, Fuzhou 350108, China

<sup>b</sup> State Key Laboratory of Structural Chemistry, Fujian Institute of Research on the Structure of Matter, Chinese Academy of Sciences, Fuzhou, Fujian 350002, P. R. China

<sup>c</sup> Fujian Science & Technology Innovation Laboratory for Optoelectronic Information of China, Fuzhou, Fujian 350108, P. R. China

\* Corresponding Author to E-mail: [jgxu@fafu.edu.cn](mailto:jgxu@fafu.edu.cn) (J.-G. Xu).

**Index:**

**1. Experimental details**.....**S3**  
**2. Tables** .....**S4**  
**3. Graphics**.....**S5**  
**4. References**.....**S7**

## 1. Experimental details

**Heat of combustion.** The constant-volume combustion energies of the compounds were determined by a precise oxygen bomb calorimetry (5E-AC8018, Changsha Kaiyuan Instruments, China). Firstly, we adopt the certified benzoic acid (about 1.0 g, pellet), which has an isothermal heat of combustion of  $(-26434 \pm 3) \text{ J} \cdot \text{g}^{-1}$  at 298.15 K, by the combustion in an oxygen atmosphere to calibrate the calorimeter. Then, 150 mg of the samples were prepared and mixed with certified benzoic acid, which were pressed to form a pellet to ensure better combustion. Finally, the pellet was placed in combustion pots, which were subsequently burned in an atmosphere of pure oxygen.

**Sensitivities Test.** The mechanical sensitivities of the compounds were determined according to the BAM (German: Bundesanstalt für Materialforschung und Prüfung) standard for friction and impact. The classification of the tested compounds results from the “UN Recommendations on the Transport of Dangerous Goods”<sup>2</sup>. Test conditions: 16 °C (temperature); 42 % (relative humidity).

**Impact sensitivity.** The impact sensitivity was tested on a BAM fall hammer BFH-12 produced by OZM Research. Impact sensitivity tests were carried out according to STANAG 4489. A weight was dropped from a set height onto a 10 mg sample placed on a copper cap. Each subsequent test was made at the next lower height if explosion occurred and at the next higher height if no explosion happened until the value of 50 % probability of the explosion is obtained. The values of **1** and **2** are > 40 and 32 J, respectively by dozens of experiments.

**Friction sensitivity.** The friction sensitivity was determined using a FSKM-10 BAM friction apparatus produced by OZM Research on the basis of STANAG 4487. The friction sensitivities of **1** and **2** are > 360 and 324 N, respectively. Compound **1** belongs to insensitive explosives while compound **2** belongs to sensitive explosives.

## 2. Tables

**Table S1. Selected bond distances (Å) and bond angles (°).**

| Compound 1          |            |                     |            |
|---------------------|------------|---------------------|------------|
| Zn(1)–N(1)          | 2.011(4)   | Zn(1)–N(4)#2        | 2.014(4)   |
| Zn(1)–N(7)#1        | 2.063(4)   | Zn(1)–Br(1)         | 2.3554(8)  |
| N(1)–Zn(1)–N(7)#1   | 100.18(15) | N(7)#1–Zn(1)–Br(1)  | 105.79(11) |
| N(1)–Zn(1)–N(4)#2   | 108.92(16) | N(4)#2–Zn(1)–N(7)#1 | 99.64(15)  |
| N(1)–Zn(1)–Br(1)    | 123.58(12) | N(4)#2–Zn(1)–Br(1)  | 114.67(12) |
| Compound 2          |            |                     |            |
| Cd(1)–N(7)#1        | 2.382(4)   | Cd(1)–N(4)#4        | 2.370(4)   |
| Cd(1)–N(7)#2        | 2.382(4)   | Cd(1)–N(2)          | 2.363(4)   |
| Cd(1)–N(4)#3        | 2.370(4)   | Cd(1)–N(2)#5        | 2.363(4)   |
| N(7)#1–Cd(1)–N(7)#2 | 180.0      | N(2)#5–Cd(1)–N(7)#2 | 88.88(14)  |
| N(4)#3–Cd(1)–N(7)#1 | 94.05(14)  | N(2)–Cd(1)–N(7)#1   | 88.88(14)  |
| N(4)#3–Cd(1)–N(7)#2 | 85.95(14)  | N(2)–Cd(1)–N(7)#2   | 91.12(14)  |
| N(4)#4–Cd(1)–N(7)#2 | 94.05(14)  | N(2)#5–Cd(1)–N(4)#4 | 86.01(14)  |
| N(4)#4–Cd(1)–N(7)#1 | 85.95(14)  | N(2)#5–Cd(1)–N(4)#3 | 93.99(14)  |
| N(4)#3–Cd(1)–N(4)#4 | 180.0      | N(2)–Cd(1)–N(4)#4   | 93.99(14)  |
| N(2)#5–Cd(1)–N(7)#1 | 91.12(14)  | N(2)–Cd(1)–N(4)#3   | 86.01(14)  |
| N(2)–Cd(1)–N(2)#5   | 180.00(18) |                     |            |

Symmetry codes for **1**: #1  $1 - x, 1 - y, 1 - z$ ; #2  $1/2 - x, -1/2 + y, 3/2 - z$ ; #3  $1/2 - x, 1/2 + y, 3/2 - z$ ; For **2**: #1  $1 - x, -1/2 + y, 3/2 - z$ ; #2  $x, 1/2 - y, -1/2 + z$ ; #3  $3/2 - x, -1/2 + y, z$ ; #4  $-1/2 + x, 1/2 - y, 1 - z$ ; #5  $1 - x, -y, 1 - z$ ; #6  $1 - x, 1/2 + y, 3/2 - z$ ; #7  $1/2 + x, 1/2 - y, 1 - z$ .

### 3. Graphics

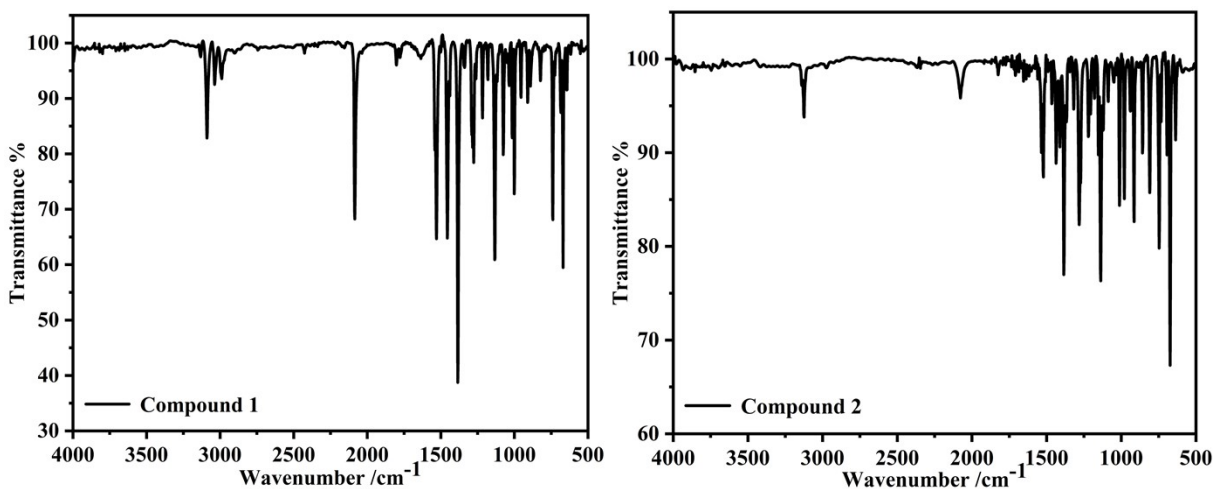

Figure S1 The FT-IR spectra of **1** and **2**.

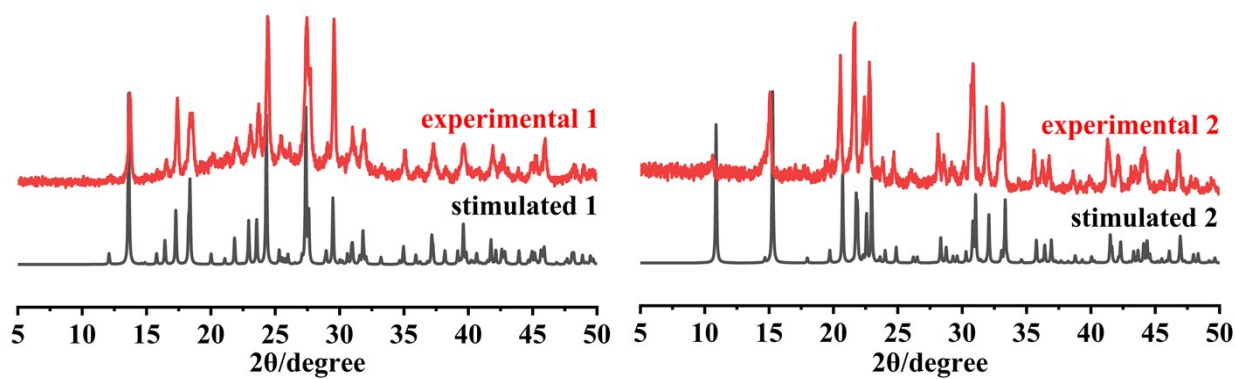

Figure S2 Powdered X-ray diffraction (PXRD) patterns of **1** and **2**.

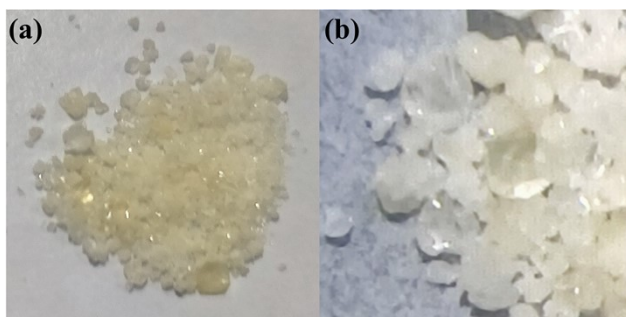

**Figure S3** Crystal morphologies of (a) compound 1 and (b) compound 2.

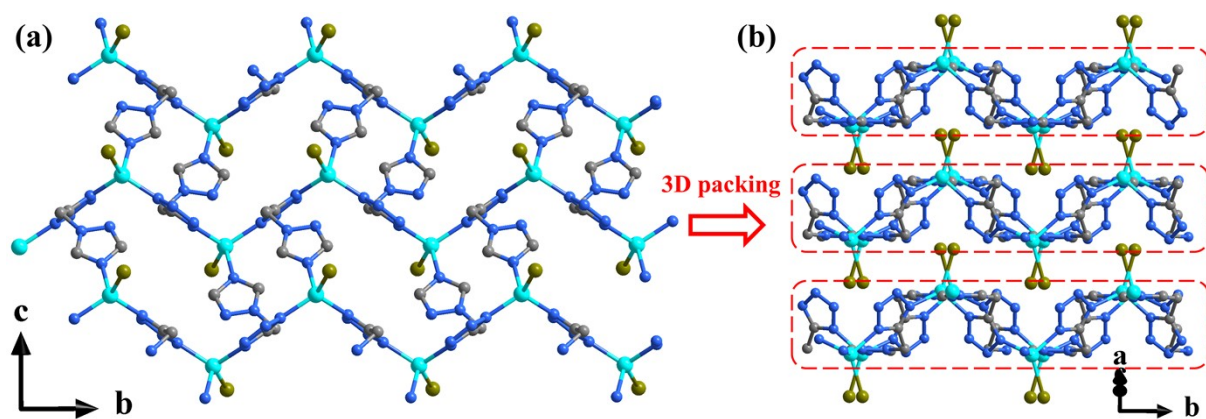

**Figure S4** (a) The 2D planar layers of compound 1 parallel to the  $bc$  plane and (b) stacking modes of 2D layers.

## 4. References

[1] Y. Wang, J.-C. Zhang, H. Su, S.-H. Li, S.-W. Zhang, and S.-P. Pang, *J. Phys. Chem. A*, 2014, **118**, 4575-4581.

[2] Impact: insensitive  $> 40$  J, less sensitive  $\geq 35$  J, sensitive  $\geq 4$  J, very sensitive  $\leq 3$  J; Friction: insensitive  $> 360$  N, less sensitive = 360 N,  $80$  N  $<$  sensitive  $< 360$  N, very sensitive  $\leq 80$  N, extremely sensitive  $\leq 10$  N.
